# Supplementary material for: Association between frailty and risk of fall among diabetic patients
Source: PubMed Central journal article supplement — Endocr Connect. 2020 Oct 7;9(10):1057–64. doi: 10.1530/EC-20-0405 (PMC7707831; doi:10.1530/ec-20-0405), 2020-10-07
Supplement: supplementary_table_1.pdf [file supplementary_table_1.pdf]

**Supplementary Table 1.** The deficit variables and their coding for the frailty index.

| Deficit Variable                                     | Coding                                                   |
|------------------------------------------------------|----------------------------------------------------------|
| <b>Co-morbidities (n=15)</b>                         |                                                          |
| Has hypertension                                     | Yes=1, no=0                                              |
| Has dyslipidemia                                     | Yes=1, no=0                                              |
| Has diabetes or high blood glucose                   | Yes=1, no=0                                              |
| Has cancer                                           | Yes=1, no=0                                              |
| Has chronic lung diseases                            | Yes=1, no=0                                              |
| Has liver disease                                    | Yes=1, no=0                                              |
| Has heart disease                                    | Yes=1, no=0                                              |
| Has stroke                                           | Yes=1, no=0                                              |
| Has kidney disease                                   | Yes=1, no=0                                              |
| Has stomach or other digestive disease               | Yes=1, no=0                                              |
| Has emotional, nervous, or psychiatric problems      | Yes=1, no=0                                              |
| Has memory-related disease                           | Yes=1, no=0                                              |
| Has arthritis or rheumatism                          | Yes=1, no=0                                              |
| Has asthma                                           | Yes=1, no=0                                              |
| Has depressive symptoms *                            | Yes=1, no=0                                              |
| Self-rating of health                                | Excellent=0, very good=0.25, good=0.5, fair=0.75, poor=1 |
| <b>Disabilities (n=5)</b>                            |                                                          |
| Physical disabilities                                | Yes=1, no=0                                              |
| Brain damage/mental retardation                      | Yes=1, no=0                                              |
| Permanent vision damage                              | Yes=1, no=0                                              |
| Permanent hearing damage                             | Yes=1, no=0                                              |
| Permanent speech impediment                          | Yes=1, no=0                                              |
| <b>Activities of daily living (ADL) (n=19)</b>       |                                                          |
| Limitations in walking 100 meters                    | Yes=1, need help=0.66, a little=0.33, no=0               |
| Limitations in walking 1 kilometer                   | Yes=1, need help=0.66, a little=0.33, no=0               |
| Limitations in running/jogging 1 kilometer           | Yes=1, need help=0.66, a little=0.33, no=0               |
| Limitations in dressing                              | Yes=1, need help=0.66, a little=0.33, no=0               |
| Limitations in bathing or showering                  | Yes=1, need help=0.66, a little=0.33, no=0               |
| Limitations in using toilet                          | Yes=1, need help=0.66, a little=0.33, no=0               |
| Limitations in crouching, kneeling or stooping       | Yes=1, need help=0.66, a little=0.33, no=0               |
| Limitations in eating                                | Yes=1, need help=0.66, a little=0.33, no=0               |
| Limitations in doing household chores                | Yes=1, need help=0.66, a little=0.33, no=0               |
| Limitations in preparing hot meals                   | Yes=1, need help=0.66, a little=0.33, no=0               |
| Limitations in getting into or out of bed            | Yes=1, need help=0.66, a little=0.33, no=0               |
| Limitations in managing money                        | Yes=1, need help=0.66, a little=0.33, no=0               |
| Limitations in taking medications                    | Yes=1, need help=0.66, a little=0.33, no=0               |
| Limitations in shopping                              | Yes=1, need help=0.66, a little=0.33, no=0               |
| Limitations in climbing several flights of stairs    | Yes=1, need help=0.66, a little=0.33, no=0               |
| Limitations in getting up from a chair after sitting | Yes=1, need help=0.66, a little=0.33, no=0               |

---

for a long period

Limitations in reaching or extending arms      Yes=1, need help=0.66, a little=0.33, no=0

Limitations in lifting weights over 5 kilograms      Yes=1, need help=0.66, a little=0.33, no=0

Limitations in picking up a coin from a table      Yes=1, need help=0.66, a little=0.33, no=0

---

\* The depressive symptoms were measured using the Center for Epidemiologic Studies Depression (CES-D) Scale. Participants with CES-D scores no less than 10 were classified as having depressive symptoms.
